# Supplementary material for: Suppression of phase segregation in red CsPbIBr 2 -based perovskite LECs/LEDs: impact of Mn doping, crystallization control, and grain passivation
Source: Royal Society of Chemistry journal article supplement (doi:10.1039/d4tc05504g), 2025-01-01
Supplement: d4tc05504g1.pdf [file d4tc05504g1.pdf]

**Suppression of phase segregation in CsPbIBr<sub>2</sub>-based perovskites red  
LEC/LED: impact of Mn doping, crystallization control, and grain passivation**

Andrei S. Toikka, Ramazan Kenesbay, Maria Baeva, Dmitry M. Mitin, Maria Sandzhieva, Aleksandr  
Goltaev, Vladimir Fedorov, Alexander Pavlov, Dmitry Gets, Ivan Mukhin and Sergei Makarov

**Supplementary Information**

## Optimization of Mn-doping and thermal treatment

Fixed parameters: 0.4 molar perovskite concentration, perovskite:(PEO+PVDF):LiTFSi mass ratio – 1:0.1:0.01; PEO:PVDF mass ratio – 1:9; spin-coating – 1000 rpm for 60 s; vacuuming temperature – 60 °C. Variable parameters: stoichiometry of  $\text{CsPb}_{1-x}\text{Mn}_x\text{IBr}_2$  ( $0 \leq x \leq 0.1$ ), annealing temperature 60-70°C (for  $x=0$ ) and 70-80°C (for  $x>0$ ).

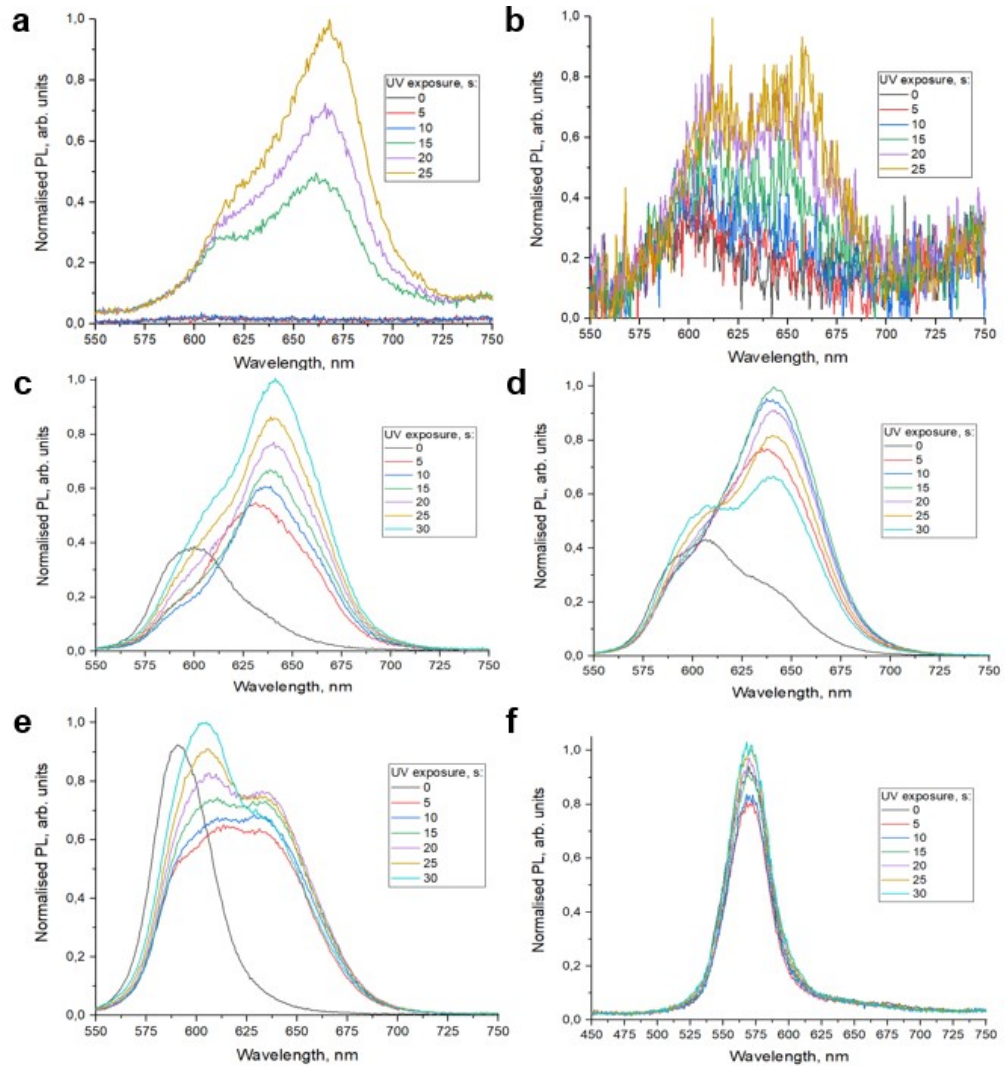

**Fig. S1.** Normalized PL flux temporal dependencies of perovskite-based structures with various content of Mn and annealing temperature: 0 wt. % - 60°C (a) and 70°C (b); 5 wt. % - 70°C (c) and 80°C (d); 10 wt. % - 70°C (e) and 80°C (f)

PL intensity is limited due to the defects, in particular with the formation of Br-rich areas (Fig.S2(c-f)).

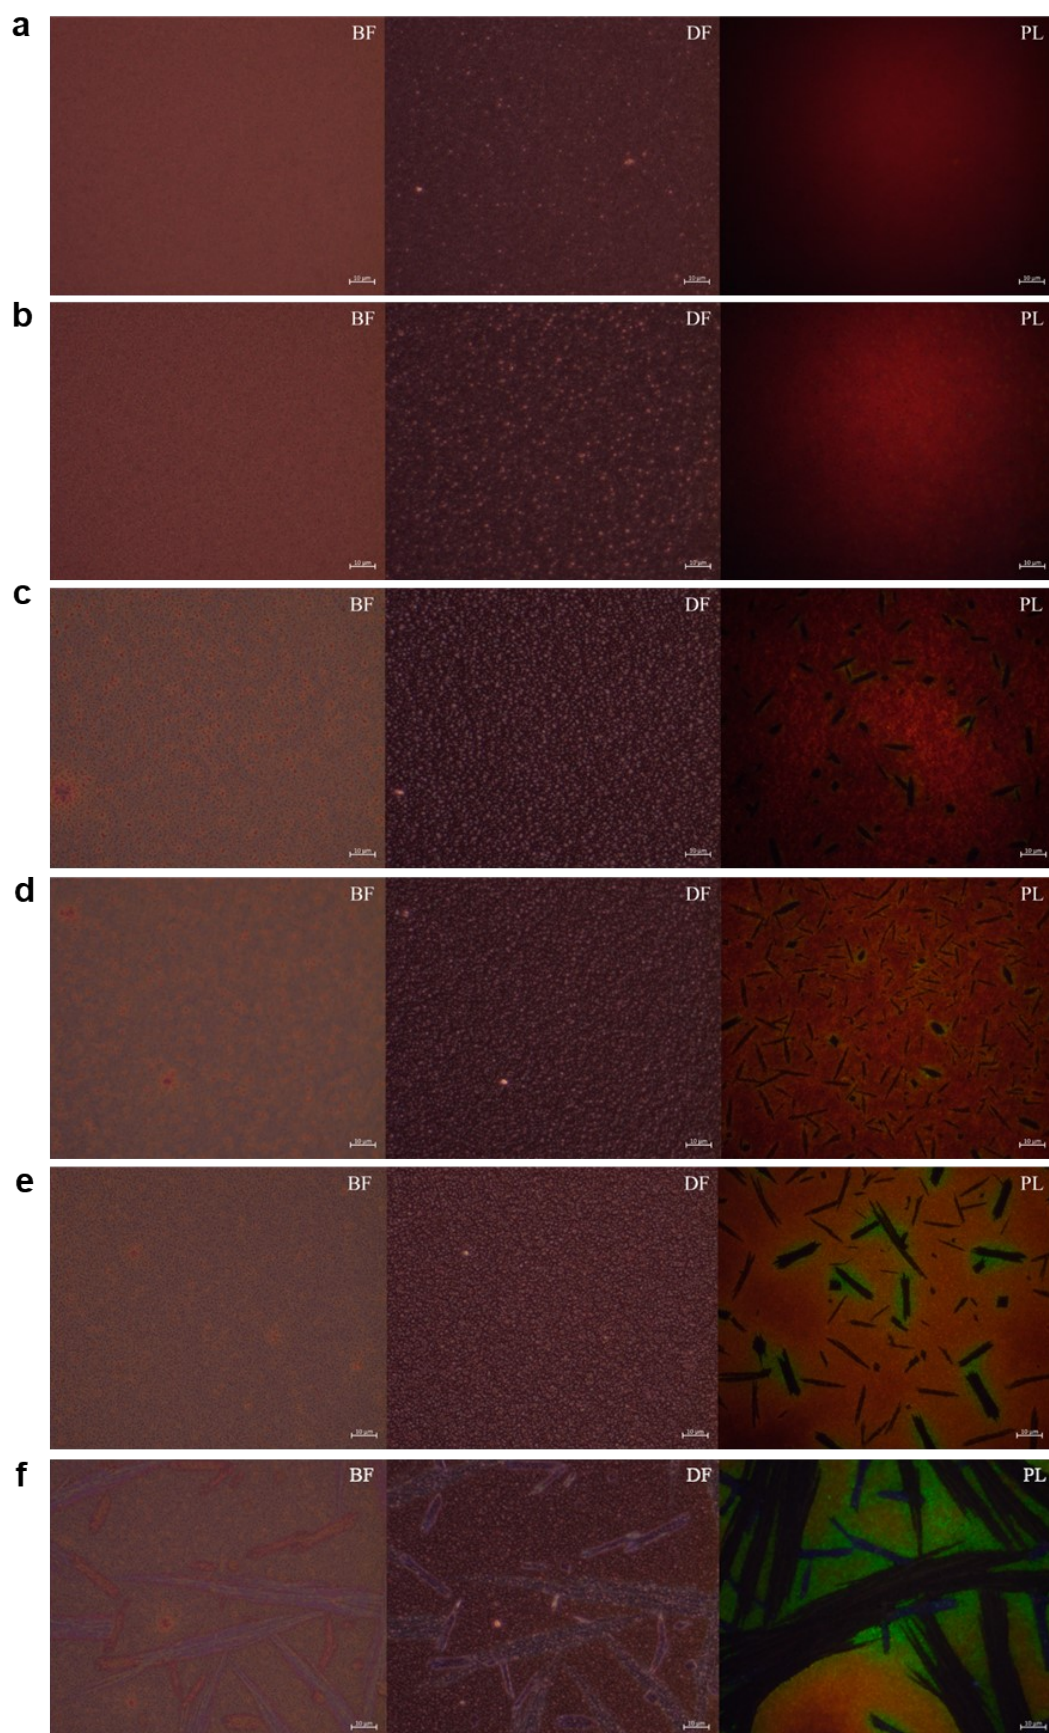

**Fig. S2.** Optical microscopy in bright field (BF), dark field (DF), photoluminescence (PL) mode of perovskite-based structures with various content of Mn and annealing temperature: 0 wt. % - 60°C (a) and 70°C (b); 5 wt. % - 70°C (c) and 80°C (d); 10 wt. % - 70°C (e) and 80°C (f)

PL images of samples without Mn doping don't reveal Br-rich areas due to the small PL intensity. However, PL spectral measurements (Fig. S1(a,b)) demonstrate this aspect.

Thus, based on the required PL peak's position and FWHM, regimes with Mn content (5 wt. %) and annealing temperatures of (70-80°C) are optimal in this series. The further optimization was provided by searching for PEO/PVDF optimal ratio.

### Spectrophotometry and Tauc plot

Spectral dependencies of OD were measured directly via spectrophotometer. This parameter demonstrates the relationship between incident ( $\Phi_{in}$ ) and transmitted ( $\Phi_{out}$ ) optical flux respectively [S1]:

$$OD = \lg\left(\frac{\Phi_{in}}{\Phi_{out}}\right) = \lg\left(\frac{\Phi_{in}}{\Phi_{in}T_{sub}T_{sample}}\right) = -\lg(T_{sub}T_{sample}), \quad (S1)$$

where  $T_{sub}$  and  $T_{sample}$  – transmittance of substrate and sample, respectively.

The conventional method for the determination of optical band gap ( $E_g^{opt}$ ) is an application of Tauc plot [S2]. According to Tauc's assumption, the absorption coefficient ( $\alpha$ ) for directly allowed interband transitions could be described near the band edge via the quadratic dependence versus photon energy ( $E=h\nu$ ):

$$\alpha(h\nu) \cdot h\nu \sim (h\nu - E_g^{opt})^{1/2} \quad (S2)$$

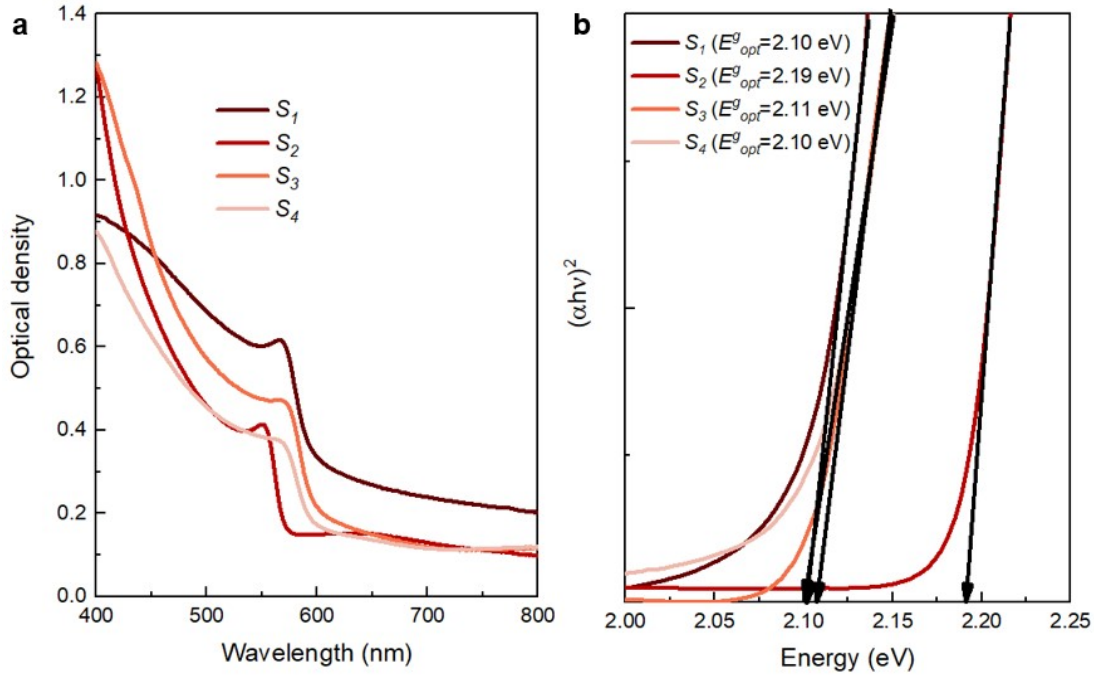

**Fig. S3.** (a) OD spectral dependencies of CsPbIBr<sub>2</sub>-based thin films, (b) Tauc plots for S1-S4 samples. Legend shows the estimated band gap values.

Table S1 presents the bandgap value for CsPbIBr<sub>2</sub>-based and related materials reported in the literature.

**Table. S1.** The values of band gap for CsPbIBr<sub>2</sub>-based and related materials

| Structure                                                                                    | Band gap (eV)          | Comment                                | Ref.  |
|----------------------------------------------------------------------------------------------|------------------------|----------------------------------------|-------|
| CsPbBr <sub>2</sub> (thin film)                                                              | ~2.12 eV (optical)     | Tauc plot                              | [S3]  |
| CsPbIBr <sub>2</sub> (nanocrystals)                                                          | ~2.10 eV (optical)     | Tauc plot                              | [S4]  |
| CsPbIBr <sub>2</sub>                                                                         | ~2.00 eV               | DFT study (mBJ-GGA potential)          | [S5]  |
| CsPbIBr <sub>2</sub>                                                                         | ~2.391 eV (electronic) | DFT study (plane-wave pseudopotential) | [S6]  |
| CsPbIBr <sub>2</sub>                                                                         | ~2.05 eV               | -                                      | [S7]  |
| CsPbIBr <sub>2</sub>                                                                         | ~2.08 eV               | -                                      | [S8]  |
| CsPbIBr <sub>2</sub>                                                                         | ~2.05 eV               | Absorption spectra                     | [S9]  |
| CsPbIBr <sub>2</sub> (nanocrystals)                                                          | ~2.21 eV (optical)     | Tauc plot                              | [S10] |
| CsPbIBr <sub>2</sub> (thin film)                                                             | ~2.05 eV (optical)     | Tauc plot                              | [S11] |
| CsPb <sub>0.9</sub> Mn <sub>0.1</sub> IBr <sub>2</sub> (thin film)                           | ~2.02 eV (optical)     |                                        |       |
| CsPbIBr <sub>2</sub> (thin film)                                                             | ~1.89 eV (optical)     | Tauc plot                              | [S12] |
| CsPb <sub>0.995</sub> Mn <sub>0.00501</sub> I <sub>1.01</sub> Br <sub>1.99</sub> (thin film) | ~1.85 eV (optical)     |                                        |       |
| CsPb <sub>0.99</sub> Mn <sub>0.01</sub> I <sub>1.02</sub> Br <sub>1.98</sub> (thin film)     | ~1.81 eV (optical)     |                                        |       |
| CsPb <sub>0.98</sub> Mn <sub>0.02</sub> I <sub>1.04</sub> Br <sub>1.96</sub> (thin film)     | ~1.80 eV (optical)     |                                        |       |
| CsPb <sub>0.95</sub> Mn <sub>0.05</sub> I <sub>1.1</sub> Br <sub>1.9</sub> (thin film)       | ~1.80 eV (optical)     |                                        |       |



## SEM statistics

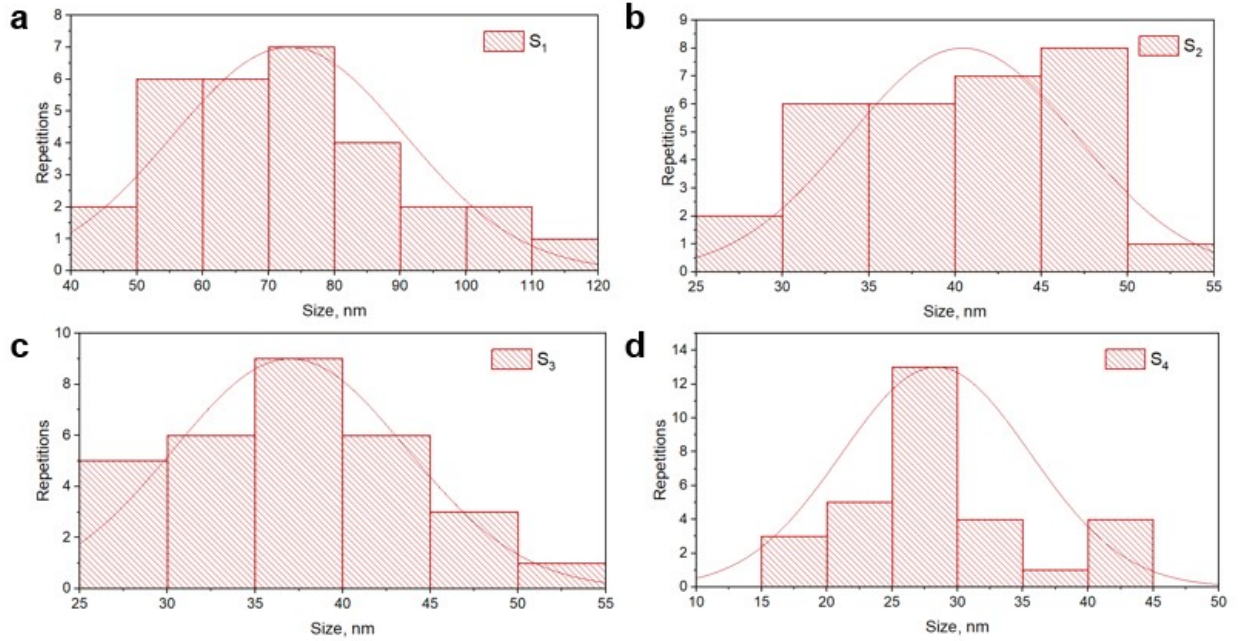

**Fig. S4.** Crystal grain size distribution for S<sub>1</sub> (a), S<sub>2</sub> (b), S<sub>3</sub> (c), S<sub>4</sub> (d) samples

**Table S2.** Crystal grain size statistic parameters for S<sub>1</sub>-S<sub>4</sub> samples

| Crystal grain size      | Sample         |                |                |                |
|-------------------------|----------------|----------------|----------------|----------------|
|                         | S <sub>1</sub> | S <sub>2</sub> | S <sub>3</sub> | S <sub>4</sub> |
| Mean value (nm)         | 73             | 40             | 37             | 28             |
| Standard deviation (nm) | 18             | 7              | 7              | 7              |

## Optimization of PEO/PVDF content

The fixed parameters: 0.4 molar perovskite concentration, stoichiometry of CsPb<sub>1-x</sub>Mn<sub>x</sub>IBr<sub>2</sub> ( $x=0.05$ ), perovskite:(PEO+PVDF):LiTFSi mass ratio – 1:0.1:0.01, spin-coating – 1000 rpm / 60 s; vacuuming temperature – 60 °C, annealing temperature – 70 °C. Variable parameters: PEO:PVDF mass ratio (1:0, 1:1, 1:2, 1:4, 1:9). PL intensity was normalized on the PL maximum intensity of the sample without PVDF content. All compared samples had stable PL, however the peak's positions were different (Figure S4). Based on the comparison of PL intensity and peak's position, the regime with PEO:PVDF=1:4 (Figure S4d) was considered to be optimal.

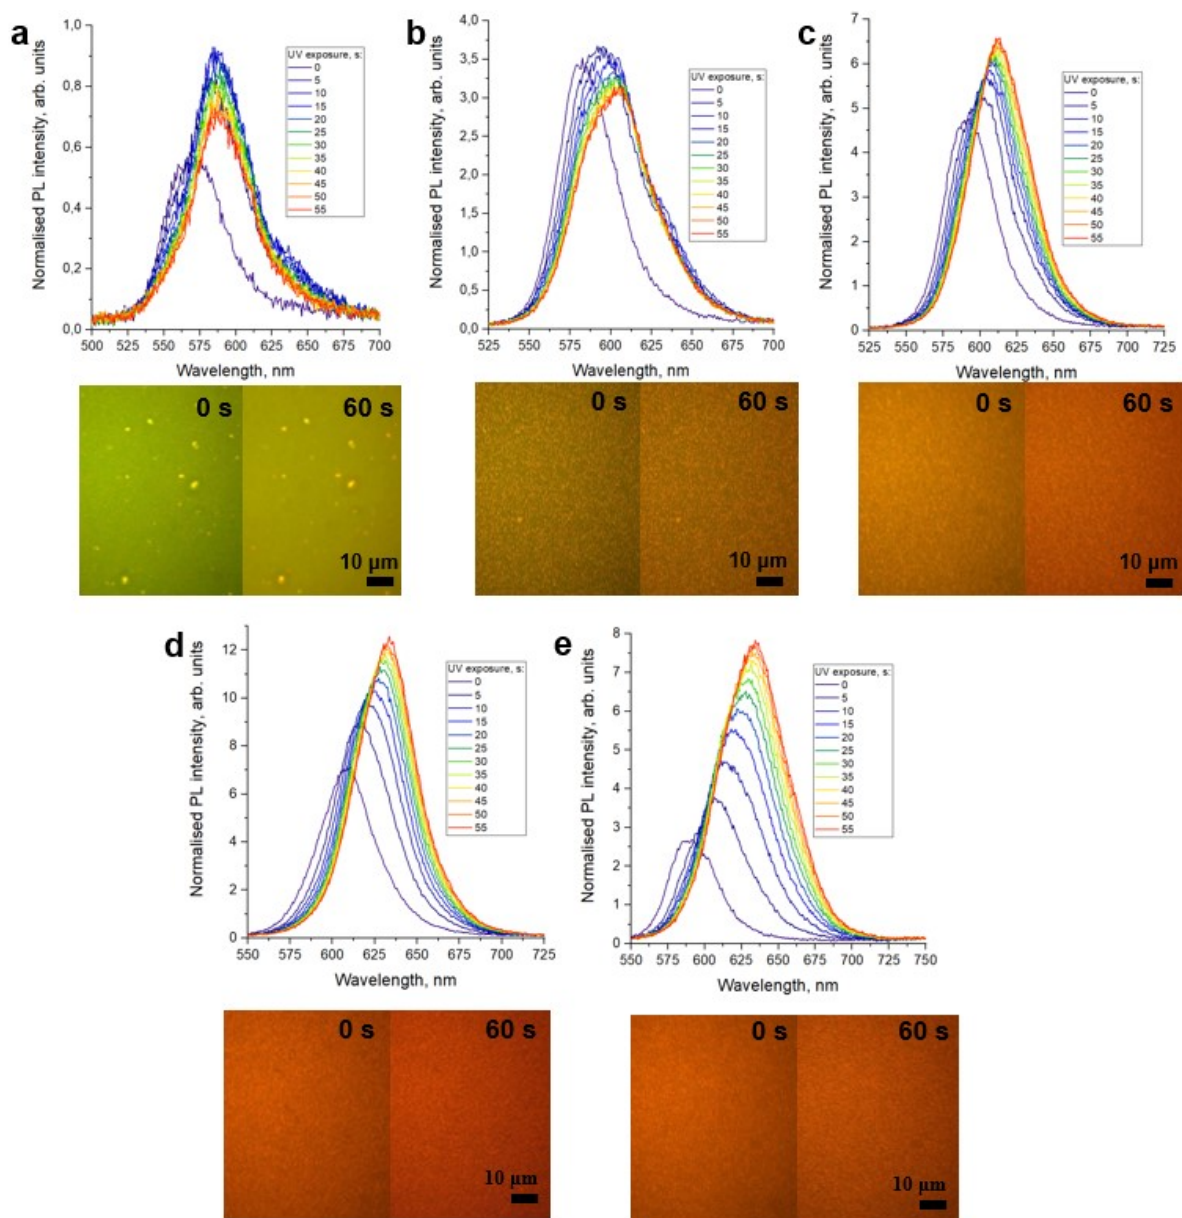

**Fig. S5.** PL spectra and maps of perovskite-based thin films with the various PEO:PVDF mass ratio and various time of UV exposure: 1:0 (a), 1:1 (b), 1:2 (c), 1:4 (d), 1:9 (e). Labels “0 s” and “60 s” correspond to UV-exposure time of samples during PL measurements.

## EDX measurements

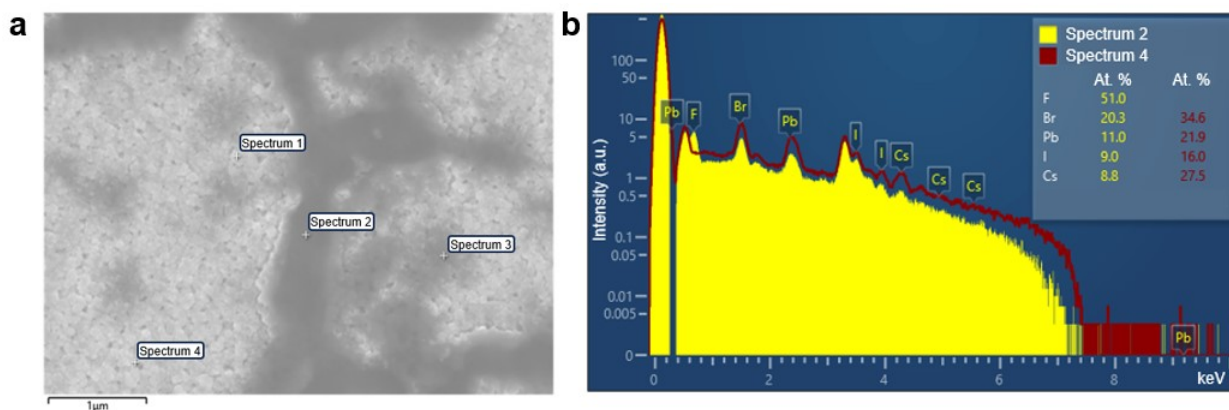

**Fig. S6.** SEM image of  $S_1$  sample surface (a) and related EDX spectra (b)

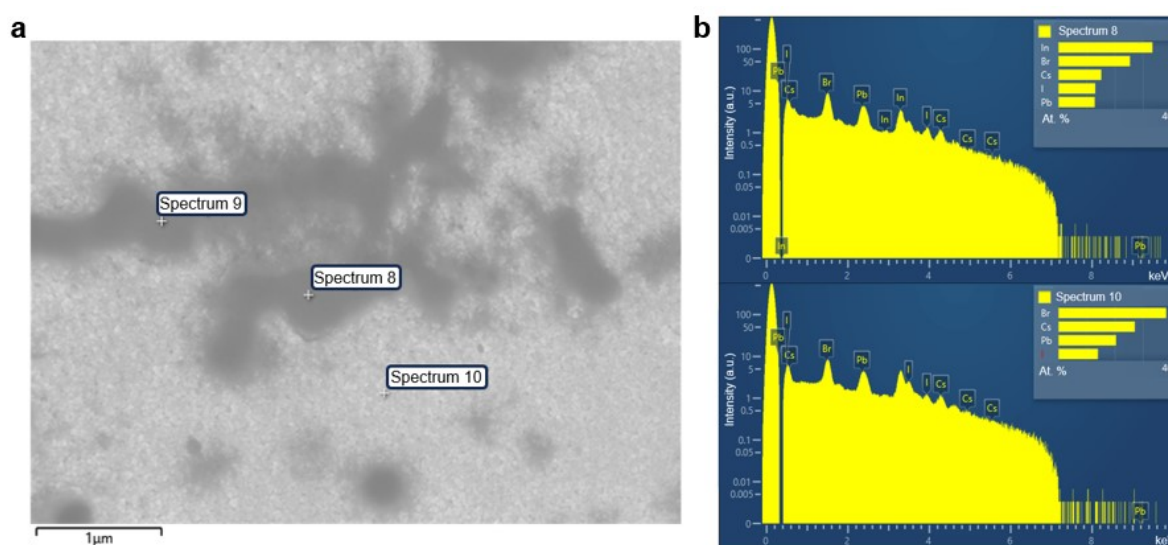

**Fig. S7.** SEM image of  $S_2$  sample surface (a) and related EDX spectra (b)

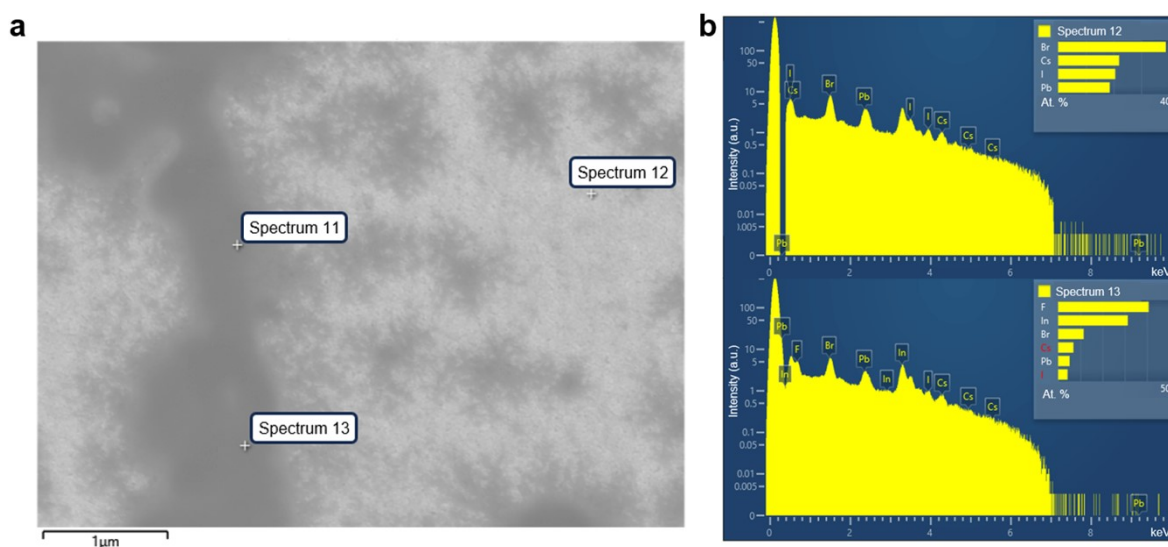

**Fig. S8.** SEM image of  $S_3$  sample surface (a) and related EDX spectra (b)



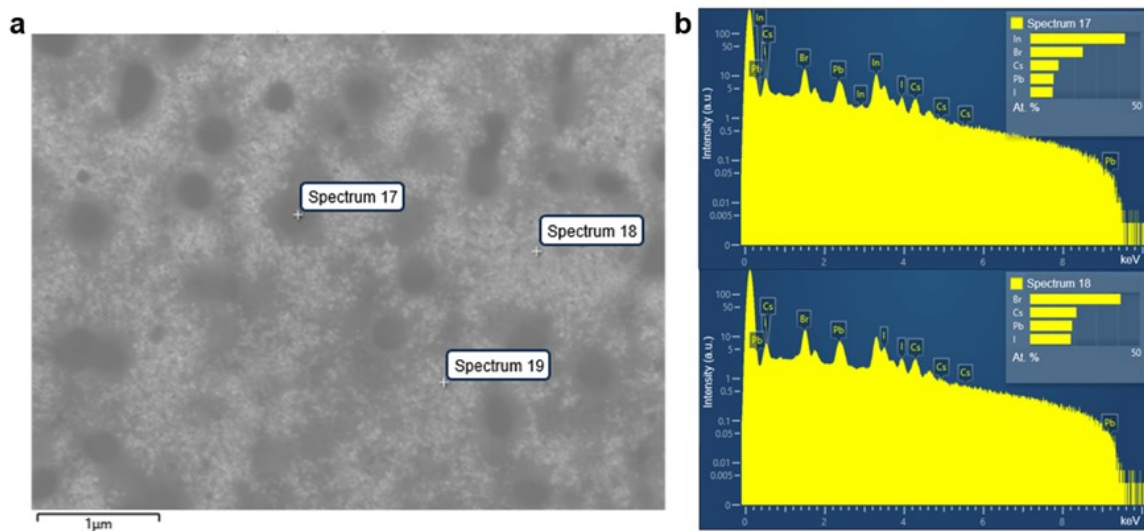

**Fig. S9.** SEM image of S<sub>4</sub> sample surface (a) and related EDX spectra (b)

**Table S3.** The acquired Br/I ratio in S<sub>1</sub>-S<sub>4</sub> samples (EDX data).

| Sample         | Br/I ratio           |     |     |                   |     |     |
|----------------|----------------------|-----|-----|-------------------|-----|-----|
|                | Perovskite-rich area |     |     | Polymer-rich area |     |     |
|                | Min                  | Avg | Max | Min               | Avg | Max |
| S <sub>1</sub> | 2.1                  | 2.1 | 2.2 | 3.7               | 3.8 | 4.0 |
| S <sub>2</sub> | 2.7                  | 2.7 | 2.8 | 1.8               | 1.9 | 2.0 |
| S <sub>3</sub> | 1.8                  | 1.8 | 2.0 | 2.6               | 2.6 | 2.7 |
| S <sub>4</sub> | 2.1                  | 2.1 | 2.2 | 2.3               | 2.4 | 2.5 |

Figure S10 shows SEM and EDX results for S<sub>4</sub> sample. The bright regions in the SEM image (see left panel in Figure S10) correspond to the perovskite layer with Mn. The dark regions in the SEM image correspond to organic (F) and Mn-rich areas with low content of perovskite (see right panel in Figure S10). This makes the layer slightly inhomogeneous, however, the average lateral size of these regions doesn't exceed 0.5-1 μm, which does not significantly deteriorate the PL and EL properties of S<sub>4</sub> sample. Moreover, this doesn't lead to perovskite layer phase separation, which is also confirmed by Table S3. Taking into account the results of EL tracking for S<sub>1</sub>-S<sub>4</sub> samples (see Figure S16 below and Figure 5 in the main manuscript), we suggest that S<sub>4</sub> receipt is optimal.

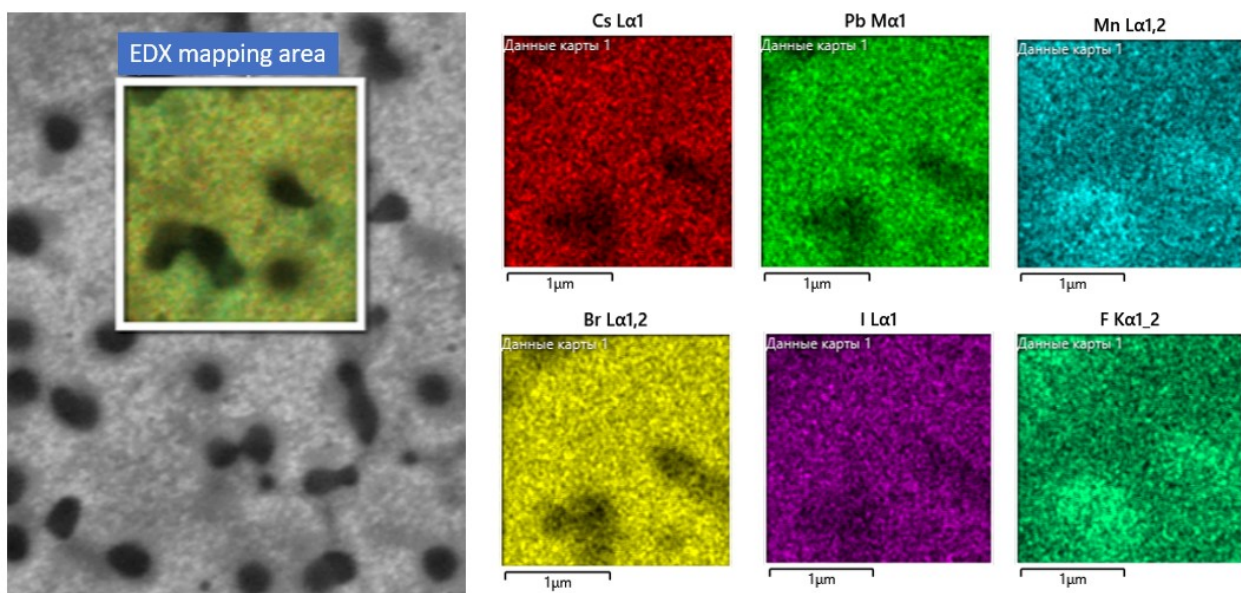

**Fig. S10.** SEM and EDX elemental mapping of S<sub>4</sub> sample

## DFT calculations

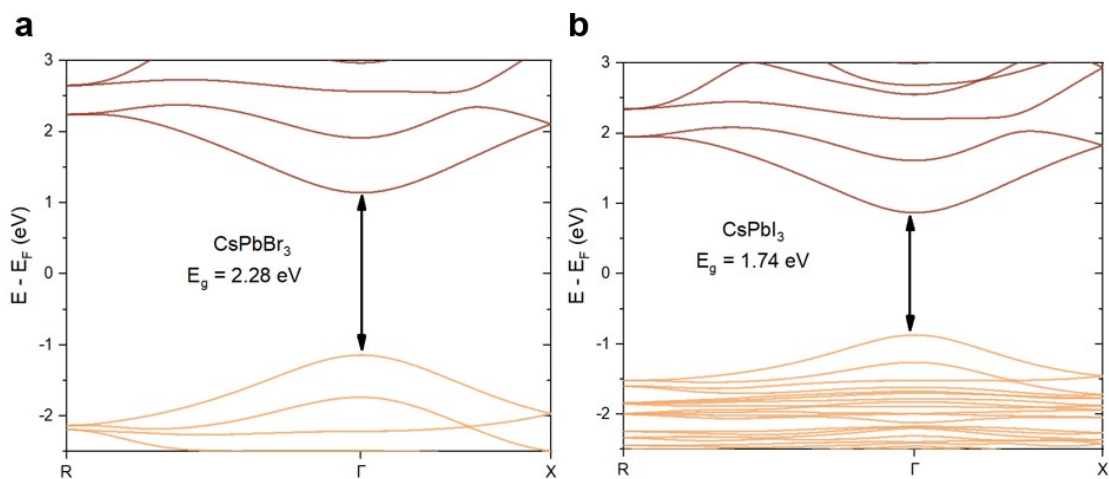

**Fig. S11.** The energy band structures along high-symmetry points for CsPbBr<sub>3</sub> (a) and CsPbI<sub>3</sub> (b) calculated using DFT and averaged over 5 random cells.  $E_F$  is a Fermi level.

## XRD measurements

Figure S12 shows close-up images of the overlapping 040, 224, and 400 Bragg reflections for the S<sub>1</sub> and S<sub>4</sub> samples. One can see that the XRD peak corresponding to samples S<sub>4</sub> is shifted towards larger  $2\theta$  angles by 0.1 degree compared to the sample S<sub>1</sub>, which is free of Mn doping. This indicates a smaller lattice volume compared to the S<sub>1</sub> sample, which was synthesized without adding Mn.

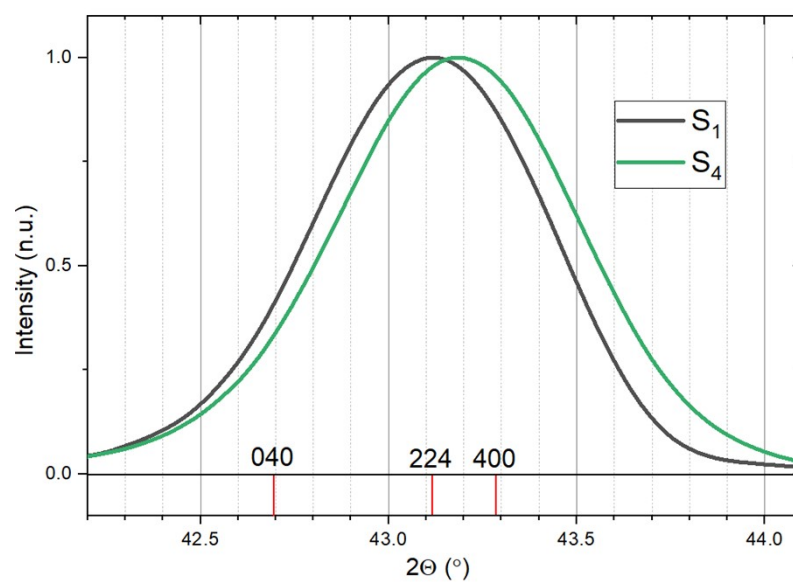

**Fig. S12.** XRD curves of the studied  $S_1$  and  $S_4$  samples

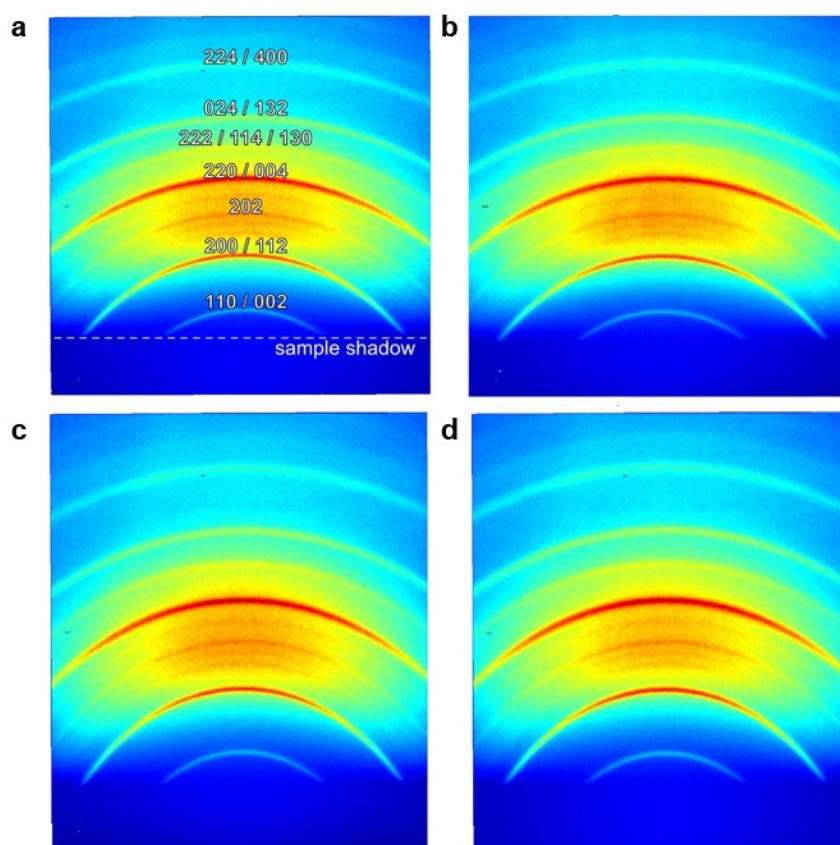

**Fig. S13.** Raw 2D CCD images of the X-ray diffraction patterns obtained from the synthesized samples: (a)  $S_1$ , (b)  $S_2$ , (c)  $S_3$ , (d)  $S_4$

**Table S4.** The lattice parameters and the  $\text{CsPb}(\text{I}_x\text{Br}_{1-x})_3$  composition obtained from the XRD data according to Vegard's law.

| Sample         | a (Å) | b (Å) | c (Å)  | pseudo-cub $\langle a_{ps-cub} \rangle$ (Å) | x (%) |
|----------------|-------|-------|--------|---------------------------------------------|-------|
| S <sub>1</sub> | 8.365 | 8.463 | 11.834 | 5.939                                       | 30    |
| S <sub>2</sub> | 8.356 | 8.461 | 11.829 | 5.935                                       | 29    |
| S <sub>3</sub> | 8.362 | 8.467 | 11.839 | 5.940                                       | 30    |
| S <sub>4</sub> | 8.362 | 8.462 | 11.824 | 5.936                                       | 29    |

### Comparison of PL distributions for samples S<sub>1</sub>-S<sub>4</sub>

PL images of samples S<sub>1</sub>-S<sub>4</sub> (Fig. S2b) were separated by “red-green-blue” (RGB) filters with 8-bit (0 - minimum, 255 - maximum, linear dependence) scale. Results for the red channel are demonstrated below in Fig. S14.

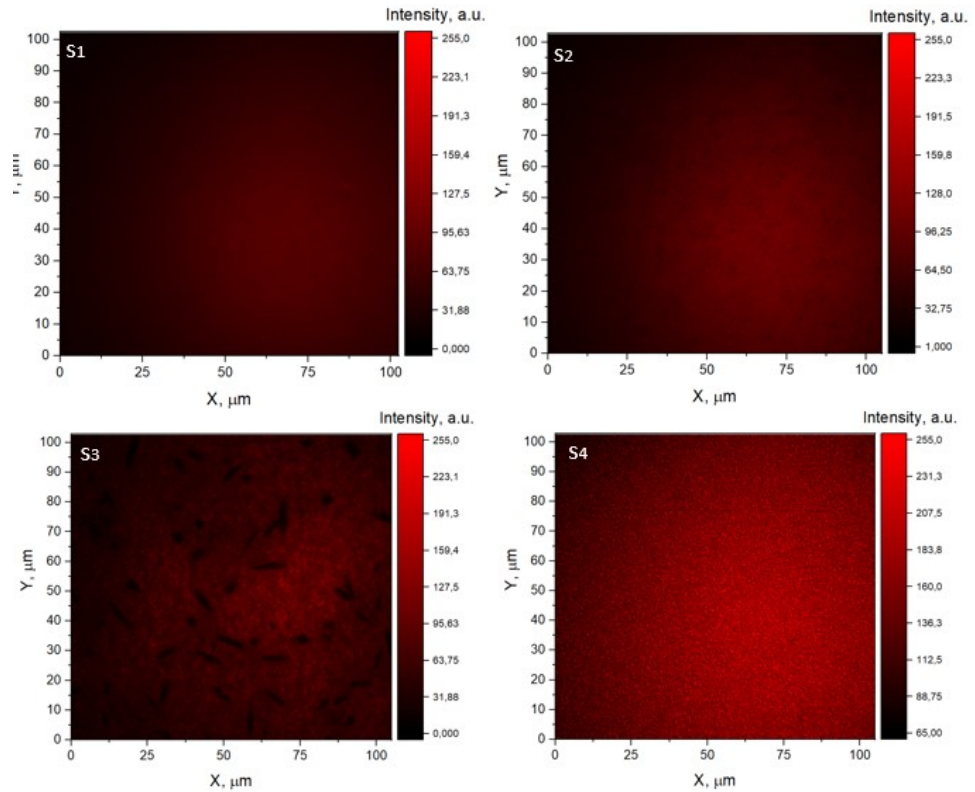

**Fig. S14.** PL intensity distribution for S<sub>1</sub>-S<sub>4</sub> samples versus surface apertures for the “red” channel in RGB 8-bit scale



Intensity distribution of reduced quantity of pixels with intensity  $I$  ( $N_{\text{pix}}(I)$ ) is demonstrated below. Here,  $N_{\text{pix}}(\text{total})$  - total quantity of pixels in images of PL.

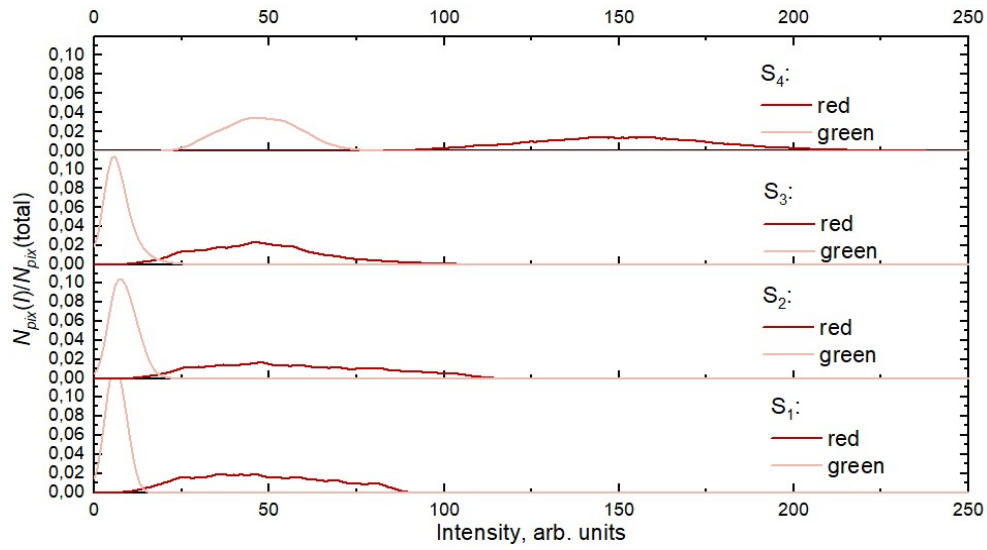

**Fig. S15.** Distribution of pixel's intensity in PL map of  $S_1$ - $S_4$  for “red” and “green” channels in 8-bit color scale

## PeLEC and PeLED device characterization

Figure S16 shows EL time-tracking for  $S_1$ - $S_3$  receipt-based PeLECs. The observed lifetime of control PeLEC ( $S_1$  sample) does not exceed 5 s (Figure S16a). After Mn doping ( $S_2$  receipt), the stability of the device was improved, and the lifetime value increased to 20-25 s (Figure S16b). The additional crystallization control optimization by annealing temperature (receipt  $S_3$ ) provided the higher EL-signal and stability of PeLEC (Figure S16c). However, the lifetime of this device was less than 1 min. The best results were achieved for  $S_4$  sample (see Figure 4 and 5 in the main manuscript).

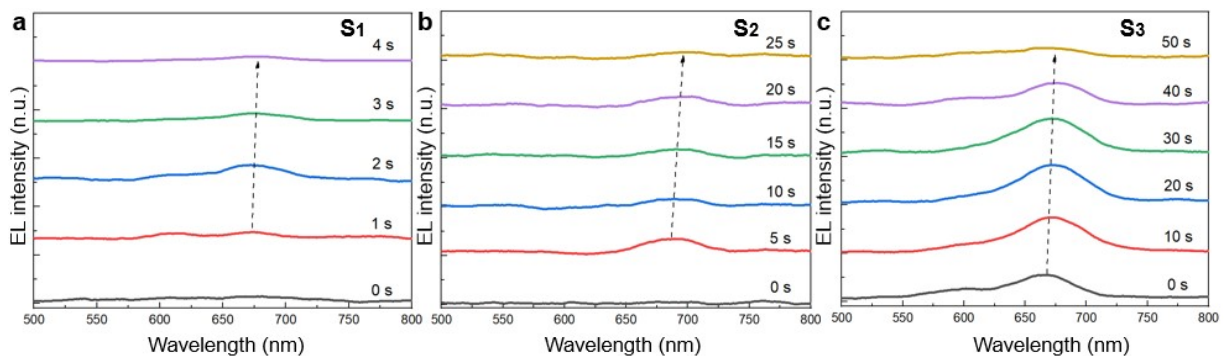

**Fig. S16.** EL spectra during PeLECs time-tracking with control  $S_1$  (a) and intermediate-optimized receipts  $S_2$  (b),  $S_3$  (c). 0 s correspond to the start of electrical field pumping. Applied bias was 5.5 V

**Table S5.** Tracking comparison of the developed PeLED and PeLEC devices (based on data from Fig. 5 in manuscript)

| CsPb <sub>0.95</sub> Mn <sub>0.05</sub> IBr <sub>2</sub> (PeLED) |                                                                                                                                                                                                                                                                                                                                | CsPb <sub>0.95</sub> Mn <sub>0.05</sub> IBr <sub>2</sub> / PEO / PVDF / LiTFSI (PeLEC) |                                                                                                                                                                                                                                                                                                                                                      |
|------------------------------------------------------------------|--------------------------------------------------------------------------------------------------------------------------------------------------------------------------------------------------------------------------------------------------------------------------------------------------------------------------------|----------------------------------------------------------------------------------------|------------------------------------------------------------------------------------------------------------------------------------------------------------------------------------------------------------------------------------------------------------------------------------------------------------------------------------------------------|
| Time range (min)                                                 | Interpretation (dominant mechanism)                                                                                                                                                                                                                                                                                            | Time range (min)                                                                       | Interpretation (dominant mechanism)                                                                                                                                                                                                                                                                                                                  |
| 0...0.12                                                         | Diffusion of ions (Cs <sup>+</sup> , I <sup>-</sup> , Br <sup>-</sup> ) [S13-S14], phase segregation (Figure S14b).                                                                                                                                                                                                            | 0...1.2                                                                                | EDL and dynamic p-i-n structure formation [S13, S15] (Figure 5a).                                                                                                                                                                                                                                                                                    |
| 0.12...1.2                                                       | Drastic phase segregation of I- and Br- anions with current density rise (Figure S14a), shift and broadening of EL peak (Figure S14b).                                                                                                                                                                                         | 1.2...3.6                                                                              | Due to the formation of EDL the thickness of layer for radiative recombination decreases and the effective electric field strength rises. This regime corresponds to the rise of current density and EL flux (Figure 5a). p-i-n structure was almost completely formed near $t = 3.6$ min, what corresponds to the maximum of EL flux (Figure 5a,b). |
| >1.2                                                             | Under current density > 250 mA/cm <sup>2</sup> breakdown of perovskite was observed. This region corresponds to the dramatic rise of current density (Figure S15a) and drop of EL intensity. EL spectra correspond to the formation of multiple regions with high quantity of defects and various stoichiometry (Figure S14b). | 3.6...12                                                                               | Rise of current density caused by diffusion of ions. In particular, it caused the starting of phase segregation with I- and Br- anions diffusion with corresponding EL shift (Figure 5b). Near $t = 12$ min the value of current density exceeded 250 mA/cm <sup>2</sup> and almost full aperture of pixel was breakdown.                            |

## References

- [S1] A.N. Matveev (eds). Optics (Mir publishers, 1988).
- [S2] Klein, J., et. al. Limitations of the Tauc Plot Method. *Advanced Functional Materials*, **2304523**, 1–19 (2023).
- [S3] Li, J., et. al. All-vacuum fabrication of yellow perovskite light-emitting diodes. *Science Bulletin* **67**, 178–185 (2022).
- [S4] Pal, S., et. al. Strain mediated light emission using heterojunctions of all-inorganic mixed-halide perovskite nanocrystals via piezo-phototronic effect. *Nano Energy* **106200**, 1–12 (2021).
- [S5] Najim, A., et. al. Theoretical investigation of structural, electronic, and optical properties of halide cubic perovskite  $\text{CsPbBr}_{3-x}\text{I}_x$ . *Materials Science in Semiconductor Processing* **106442**, 1–9 (2022).
- [S6] Maleka, P. M., et. al. Study of inorganic lead halide perovskites properties using first-principles density functional theory for photovoltaic and optoelectronic devices. *Materials Today: Proceedings* **62**, S12–S22 (2022).
- [S7] Zhang, C., et. al. Low-Temperature Crystallization of  $\text{CsPbIBr}_2$  Perovskite for High Performance Solar Cells. *Solar RRL* **2000254**, 1–8 (2020).
- [S8] Zhang, H., et. al. Suppressed light-induced phase transition of  $\text{CsPbBr}_2\text{I}$ : Strategies, progress and applications in the photovoltaic field. *Journal of Semiconductors* **071901**, 1–13 (2021).
- [S9] Zhu, W., et. al. Intermolecular Exchange Boosts Efficiency of Air-Stable, Carbon-Based All-Inorganic Planar  $\text{CsPbIBr}_2$  Perovskite Solar Cells to Over 9%. *Advanced Energy Materials* **1802080**, 1–9 (2018).
- [S10] Suhail, A., et. al. Tuneable structural and optical properties of inorganic mixed halide perovskite nanocrystals. *Applied Research* **e202200095**, 1–9 (2023).
- [S11] Zheng, L., et. al. Manganese Doped Perovskite  $\text{CsPb}_{0.9}\text{Mn}_{0.1}\text{Br}_2\text{I}$  Solar Cells with Enhanced Stability and Reduced Toxicity. *Georgia Journal of Science* **2**, 1–16 (2022).
- [S12] Liang, J., et. al. Enhancing Optical, Electronic, Crystalline, and Morphological Properties of Cesium Lead Halide by Mn Substitution for High-Stability All-Inorganic Perovskite Solar Cells with Carbon Electrodes. *Advanced Energy Materials* **1800504**, 1–7 (2018).
- [S13] Gets, D., et. al. Reconfigurable Perovskite LEC: Effects of Ionic Additives and Dual Function Devices. *Advanced Optical Materials* **2001715**, 1–21 (2021).

[S14] Mishra, A., et. al. Enhanced Operational Stability of Perovskite Light-Emitting Electrochemical Cells Leveraging Ionic Additives. *Advanced Optical Materials* **2000226**, 1–19 (2020).

[S15] Baeva, M., et. al. ITO-free silicon-integrated perovskite electrochemical cell for light-emission and light-detection. *Opto-electronic advances* **6(220154)**, 1-14 (2023).
